# Supplementary material
Source: PubMed Central journal article supplement (PMC7527036)
Supplement: JVI.01146-20-s0001.pdf [file JVI.01146-20-s0001.pdf]

## **The interaction interface of Mason-Pfizer monkey virus matrix and envelope proteins.**

**Jan Prchal<sup>1,2</sup>, Jakub Sýs<sup>2,3</sup>, Petra Junková<sup>2,3</sup>, Jan Lipov<sup>2</sup> and Tomáš Ruml<sup>2,\*</sup>**

<sup>1</sup>Laboratory of NMR Spectroscopy, University of Chemistry and Technology Prague, Czech Republic

<sup>2</sup>Department of Biochemistry and Microbiology, University of Chemistry and Technology Prague, Czech Republic

<sup>3</sup>Institute of Organic Chemistry and Biochemistry, Czech Academy of Sciences, Prague, Czech Republic

Running Title: Direct interaction between M-PMV matrix protein and Env

\* Correspondence: tomas.ruml@vscht.cz; tel.: +420 220 443 022

J. P. and J. S. contributed equally to this work

**Supplementary figures and tables:**

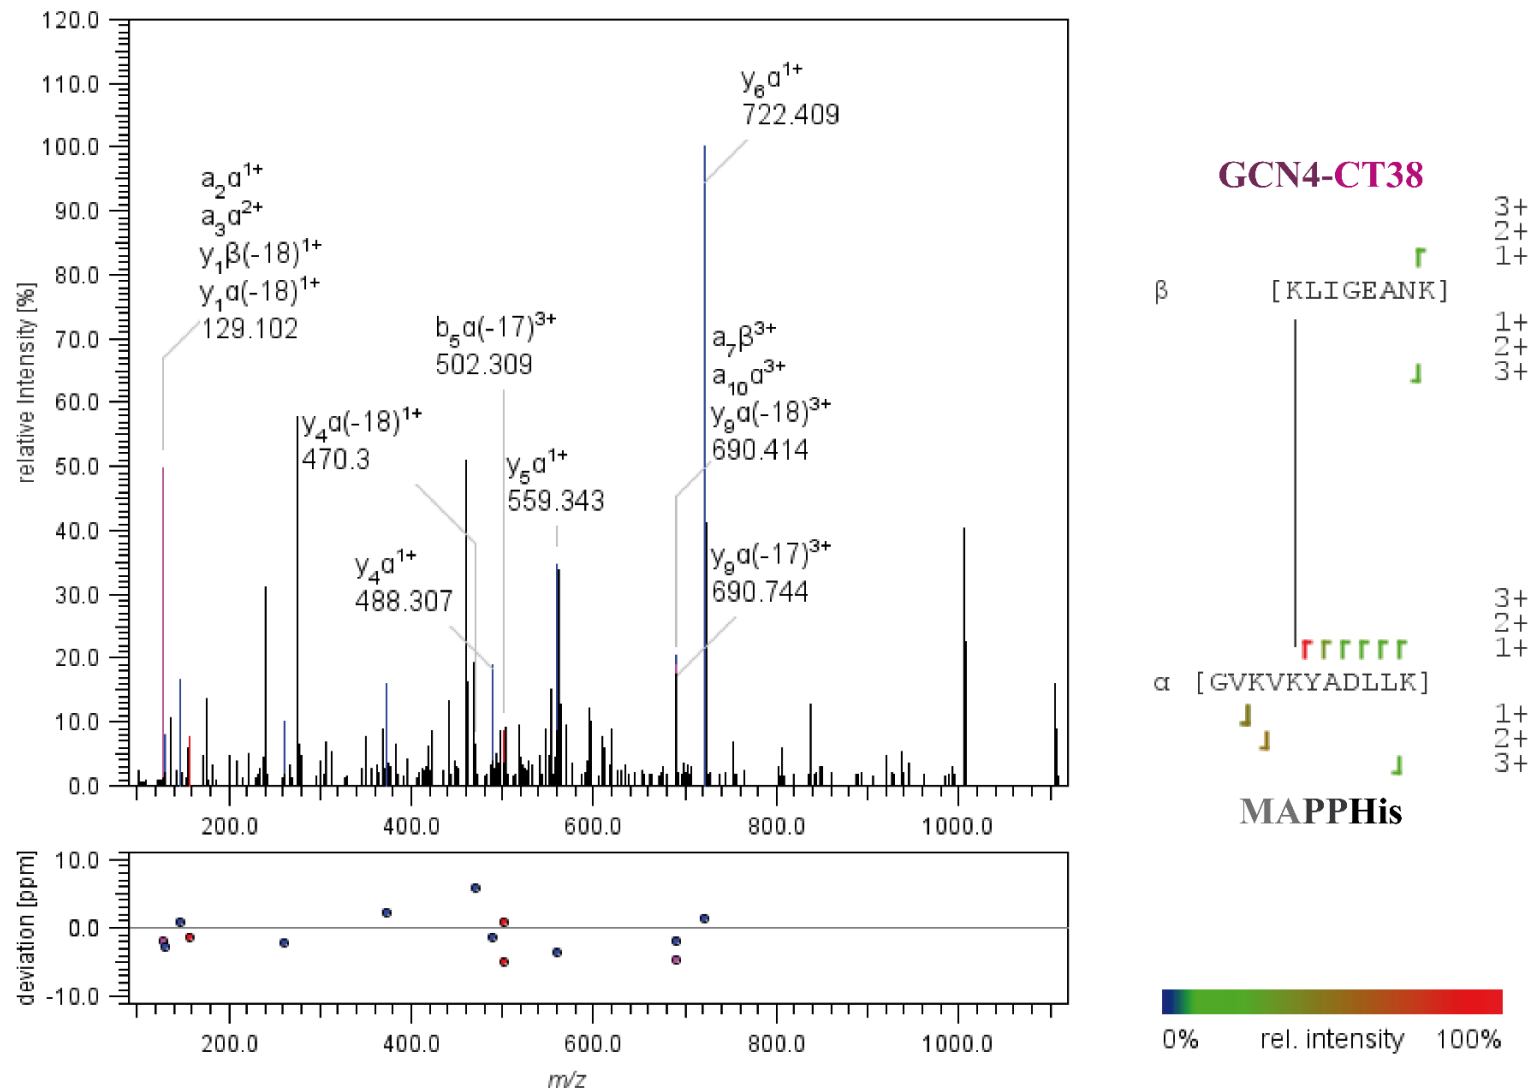

**Figure S1: The fragmentation spectrum of the K27-K27 (GCN4-CT38 to MAPPHis) cross-link.** The experimental mass of the precursor with the charge  $[M+H]^+ = 2243.336$  Da; calculated mass = 2243.337 Da; mass deviation =  $-0.67$  ppm; m/z value = 561.589; charge = +4; calculated sequence coverage: 53%; StavroX score = 51. The cross-link sequence is on the right. The longer peptide is labelled as  $\alpha$  peptide and the shorter one as  $\beta$  peptide according to the widely used nomenclature of cross-links. All identified fragment ions are displayed in sequence by symbols for the b- or y- type of ions with their charge state and colored by their relative intensity (the range is displayed below the sequence). In the fragmentation spectra, a-type ions are in orange, b-type ions are in red, y-type ions are in blue and the precursor ion is in light green (if presented). The signals assigned as both a- and y-type ions are in purple. The only matched signals are displayed in the spectra and are characterized by type, mass and charge (the numbers in the parentheses show the neutral losses during the fragmentation if they occur). The mass-deviation plot is presented as spots below the spectrum with the range in ppm.

**Table S1: Identified fragment ions of K27-K27 cross-link (Figure S1).** The only identified fragments in spectrum of K27-K27 cross-link are presented and characterized by absolute intensity, relative intensity, experimental m/z value, calculated m/z value, mass deviation in ppm, ion type, charge state, peptide type and masses of neutral losses if they occur. The longer peptide of cross-link is labelled as  $\alpha$  peptide and the shorter one as  $\beta$  peptide according to the widely used nomenclature of cross-links. The ion type column contains a-, b- or y-type of ions according to the widely used nomenclature in peptide fragmentation pathways or abbreviation P0 for precursor ion (if presented)). The last column shows loss of ammonia (-17 Da), water (-18 Da) or higher values depends on their multiplicities (if neutral loss/losses is/are presented).

| absolute intensity | relative intensity | m/z value [Da] | calculated m/z [Da] | mass deviation [ppm] | ion type | charge state | peptide type | neutral loss [Da] |
|--------------------|--------------------|----------------|---------------------|----------------------|----------|--------------|--------------|-------------------|
| 60999              | 68.4               | 129.1023       | 129.1022            | 0.6604               | a2       | 1            | $\alpha$     | 0                 |
| 60999              | 68.4               | 129.1023       | 129.1022            | 0.6604               | a3       | 2            | $\alpha$     | 0                 |
| 60999              | 68.4               | 129.1023       | 129.1022            | 0.6604               | y1       | 1            | $\beta$      | 18                |
| 60999              | 68.4               | 129.1023       | 129.1022            | 0.6604               | y1       | 1            | $\alpha$     | 18                |
| 11849.1            | 13.3               | 130.0859       | 130.0863            | -2.4923              | y1       | 1            | $\beta$      | 17                |
| 11849.1            | 13.3               | 130.0859       | 130.0863            | -2.4923              | y1       | 1            | $\alpha$     | 17                |
| 23367.4            | 26.2               | 147.1123       | 147.1128            | -3.275               | y1       | 1            | $\beta$      | 0                 |
| 23367.4            | 26.2               | 147.1123       | 147.1128            | -3.275               | y1       | 1            | $\alpha$     | 0                 |
| 7456.7             | 8.4                | 157.0958       | 157.0971            | -8.3384              | b2       | 1            | $\alpha$     | 0                 |
| 13677.2            | 15.3               | 260.1969       | 260.1969            | 0.3054               | y2       | 1            | $\alpha$     | 0                 |
| 13209.1            | 14.8               | 356.2531       | 356.2543            | -3.6083              | y3       | 1            | $\alpha$     | 17                |
| 20699.7            | 23.2               | 373.2786       | 373.2808            | -6.3704              | y3       | 1            | $\alpha$     | 0                 |
| 17975.8            | 20.1               | 488.3072       | 488.3079            | -1.3209              | y4       | 1            | $\alpha$     | 0                 |
| 14499.5            | 16.3               | 501.9784       | 501.9801            | -3.4649              | b5       | 3            | $\alpha$     | 18                |
| 12838.3            | 14.4               | 502.3101       | 502.3081            | 4.0314               | b5       | 3            | $\alpha$     | 17                |
| 12773.8            | 14.3               | 557.3364       | 557.3332            | 5.7968               | P0       | 4            |              | 17                |
| 34527.7            | 38.7               | 559.3433       | 559.345             | -3.0953              | y5       | 1            | $\alpha$     | 0                 |
| 28184.2            | 31.6               | 690.4132       | 690.4171            | -5.6795              | a7       | 3            | $\beta$      | 0                 |
| 28184.2            | 31.6               | 690.4132       | 690.4171            | -5.6795              | a10      | 3            | $\alpha$     | 0                 |
| 28184.2            | 31.6               | 690.4132       | 690.4171            | -5.6795              | y9       | 3            | $\alpha$     | 18                |
| 36119.8            | 40.5               | 690.7442       | 690.7452            | -1.2799              | y9       | 3            | $\alpha$     | 17                |
| 89226.4            | 100                | 722.4092       | 722.4083            | 1.2782               | y6       | 1            | $\alpha$     | 0                 |

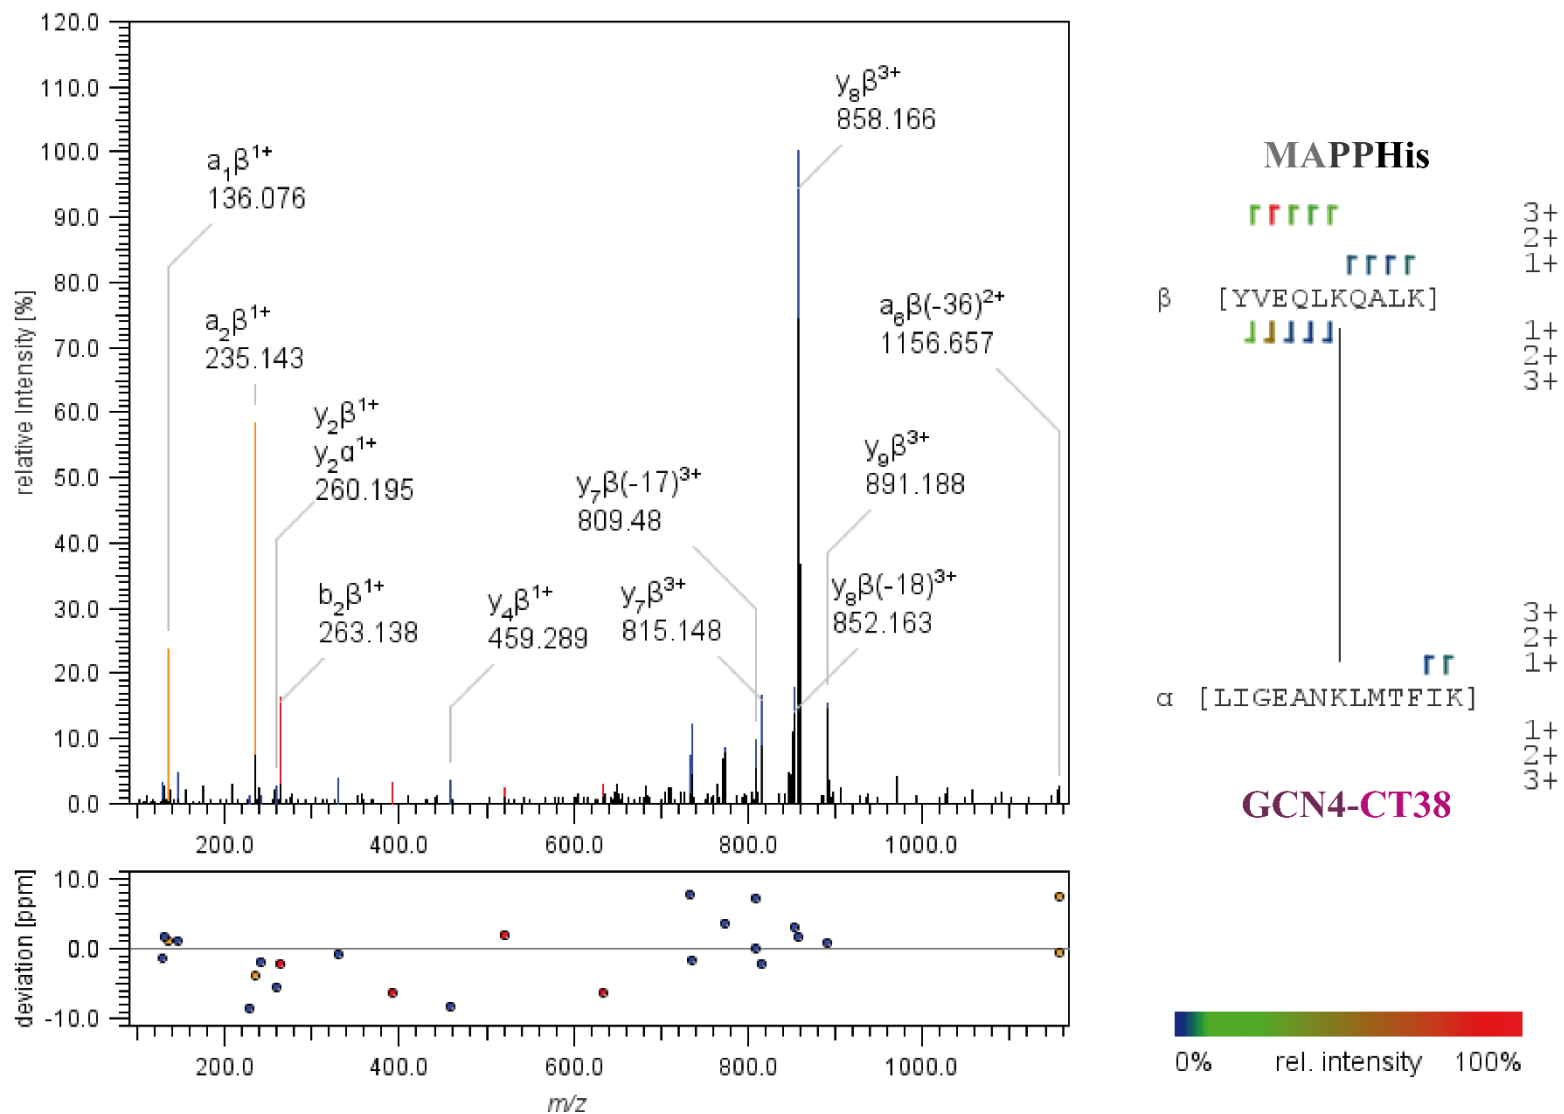

**Figure S2: The fragmentation spectrum of the K34-K16 (GCN4-CT38 to MAPPHis) cross-link.** The experimental mass of the precursor with the charge  $[M+H]^+ = 2834.615$  Da; calculated mass = 2834.610 Da; mass deviation = 1.90 ppm; m/z value = 709.409; charge = +4; calculated sequence coverage: 52%; StavroX score = 87. The cross-link sequence is on the right. The longer peptide is labelled as  $\alpha$  peptide and the shorter one as  $\beta$  peptide according to the widely used nomenclature of cross-links. All identified fragment ions are displayed in sequence by symbols for the b- or y- type of ions with their charge state and colored by their relative intensity (the range is displayed below the sequence). In the fragmentation spectra, a-type ions are in orange, b-type ions are in red, y-type ions are in blue and the precursor ion is in light green (if presented). The only matched signals are displayed in the spectra and are characterized by type, mass and charge (the numbers in the parentheses show the neutral losses during the fragmentation if they occur). The mass-deviation plot is presented as spots below the spectrum with the range in ppm.

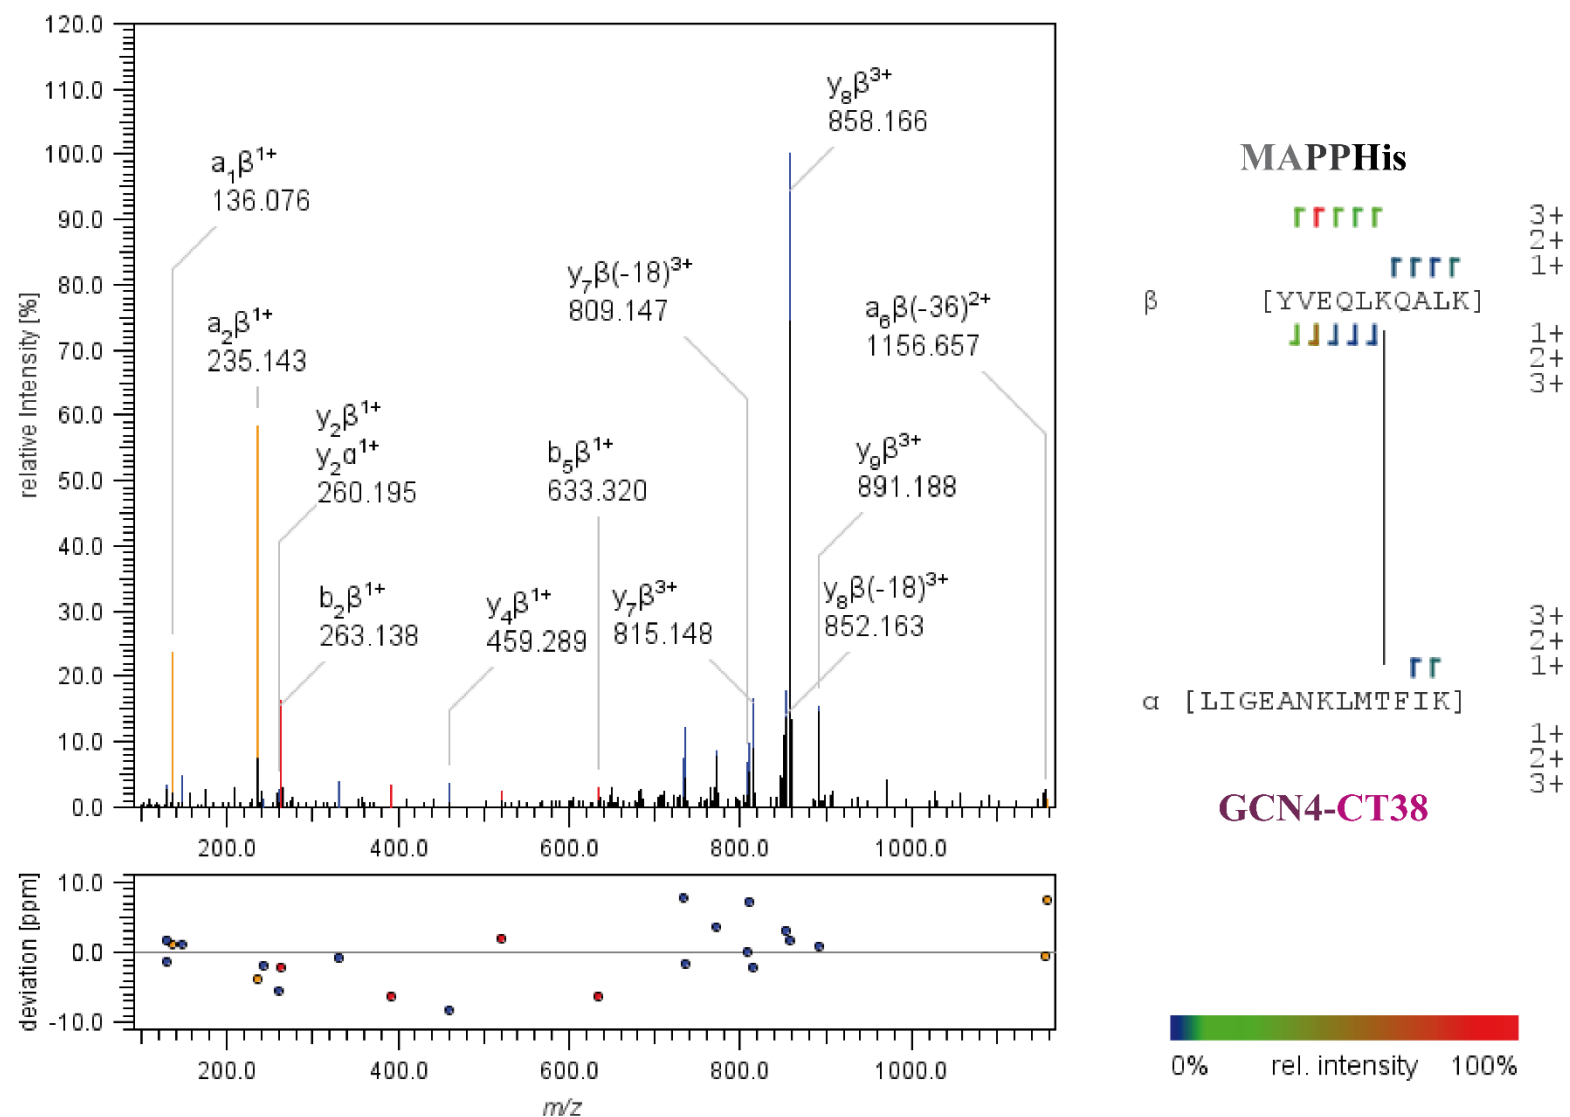

**Figure S3: The fragmentation spectrum of the T37-K16 (GCN4-CT38 to MAPPHis) cross-link.** The experimental mass of the precursor with the charge  $[M+H]^+ = 2834.615$  Da; calculated mass = 2834.610 Da; mass deviation = 1.90 ppm; m/z value = 709.409; charge = +4; calculated sequence coverage: 52%; StavroX score = 86. The cross-link sequence is on the right. The longer peptide is labelled as  $\alpha$  peptide and the shorter one as  $\beta$  peptide according to the widely used nomenclature of cross-links. All identified fragment ions are displayed in sequence by symbols for the b- or y- type of ions with their charge state and colored by their relative intensity (the range is displayed below the sequence). In the fragmentation spectra, a-type ions are in orange, b-type ions are in red, y-type ions are in blue and the precursor ion is in light green (if presented). The only matched signals are displayed in the spectra and are characterized by type, mass and charge (the numbers in the parentheses show the neutral losses during the fragmentation if they occur). The mass-deviation plot is presented as spots below the spectrum with the range in ppm.

**Table S2: Identified fragment ions of K34-K27 cross-link (Figure S2) or T37-K27 cross-link (Figure S3).** The only identified fragments in spectrum of K27-K27 cross-link are presented and characterized by absolute intensity, relative intensity, experimental m/z value, calculated m/z value, mass deviation in ppm, ion type, charge state, peptide type and masses of neutral losses if they occur. The longer peptide of cross-link is labelled as  $\alpha$  peptide and the shorter one as  $\beta$  peptide according to the widely used nomenclature of cross-links. The ion type column contains a-, b- or y-type of ions according to the widely used nomenclature in peptide fragmentation pathways or abbreviation P0 for precursor ion (if presented)). The last column shows loss of ammonia (-17 Da), water (-18 Da) or higher values depends on their multiplicities (if neutral loss/losses is/are presented).

| absolute intensity | relative intensity | m/z value [Da] | calculated m/z [Da] | mass deviation [ppm] | ion type | charge state | peptide type | neutral loss [Da] |
|--------------------|--------------------|----------------|---------------------|----------------------|----------|--------------|--------------|-------------------|
| 16953.7            | 3.3                | 129.1021       | 129.1022            | -1.283               | y1       | 1            | $\beta$      | 18                |
| 16953.7            | 3.3                | 129.1021       | 129.1022            | -1.283               | y1       | 1            | $\alpha$     | 18                |
| 10121.8            | 1.9                | 130.0865       | 130.0863            | 1.7518               | y1       | 1            | $\beta$      | 17                |
| 10121.8            | 1.9                | 130.0865       | 130.0863            | 1.7518               | y1       | 1            | $\alpha$     | 17                |
| 123904.5           | 23.8               | 136.0759       | 136.0757            | 1.2342               | a1       | 1            | $\beta$      | 0                 |
| 24683.7            | 4.7                | 147.113        | 147.1128            | 1.025                | y1       | 1            | $\beta$      | 0                 |
| 24683.7            | 4.7                | 147.113        | 147.1128            | 1.025                | y1       | 1            | $\alpha$     | 0                 |
| 6558.4             | 1.3                | 229.1183       | 229.1203            | -8.5002              | y4       | 2            | $\alpha$     | 51                |
| 304062.9           | 58.5               | 235.1432       | 235.1441            | -3.7161              | a2       | 1            | $\beta$      | 0                 |
| 6871.2             | 1.3                | 242.1859       | 242.1863            | -1.8249              | y2       | 1            | $\beta$      | 18                |
| 6871.2             | 1.3                | 242.1859       | 242.1863            | -1.8249              | y2       | 1            | $\alpha$     | 18                |
| 14540.9            | 2.8                | 260.1954       | 260.1969            | -5.4633              | y2       | 1            | $\beta$      | 0                 |
| 14540.9            | 2.8                | 260.1954       | 260.1969            | -5.4633              | y2       | 1            | $\alpha$     | 0                 |
| 84348              | 16.2               | 263.1385       | 263.139             | -2.1476              | b2       | 1            | $\beta$      | 0                 |
| 19805.5            | 3.8                | 331.2337       | 331.234             | -0.7118              | y3       | 1            | $\beta$      | 0                 |
| 17236.4            | 3.3                | 392.1791       | 392.1816            | -6.2913              | b3       | 1            | $\beta$      | 0                 |
| 19100.5            | 3.7                | 459.2888       | 459.2926            | -8.2111              | y4       | 1            | $\beta$      | 0                 |
| 12614.2            | 2.4                | 520.2411       | 520.2402            | 1.8085               | b4       | 1            | $\beta$      | 0                 |
| 14802              | 2.8                | 633.3202       | 633.3243            | -6.3677              | b5       | 1            | $\beta$      | 0                 |
| 38626.5            | 7.4                | 734.436        | 734.4304            | 7.6613               | y7       | 3            | $\alpha$     | 36                |
| 62711.1            | 12.1               | 734.768        | 734.7692            | -1.6173              | y5       | 3            | $\beta$      | 0                 |
| 44500              | 8.6                | 772.4666       | 772.4639            | 3.5526               | y6       | 3            | $\beta$      | 0                 |
| 36088.4            | 6.9                | 809.1464       | 809.1466            | -0.0233              | y7       | 3            | $\beta$      | 18                |
| 50288.8            | 9.7                | 809.4803       | 809.4746            | 7.0578               | y7       | 3            | $\beta$      | 17                |
| 85494.1            | 16.4               | 815.1484       | 815.15              | -2.0717              | y7       | 3            | $\beta$      | 0                 |
| 92956.4            | 17.9               | 852.1632       | 852.1607            | 2.9267               | y8       | 3            | $\beta$      | 18                |
| 519846.6           | 100                | 858.1657       | 858.1643            | 1.6844               | y8       | 3            | $\beta$      | 0                 |
| 80249.6            | 15.4               | 891.1878       | 891.1871            | 0.8239               | y9       | 3            | $\beta$      | 0                 |
| 7709.4             | 1.5                | 1156.6574      | 1156.6579           | -0.5192              | a6       | 2            | $\beta$      | 36                |
| 6535.6             | 1.3                | 1157.6507      | 1157.642            | 7.5403               | a6       | 2            | $\beta$      | 34                |

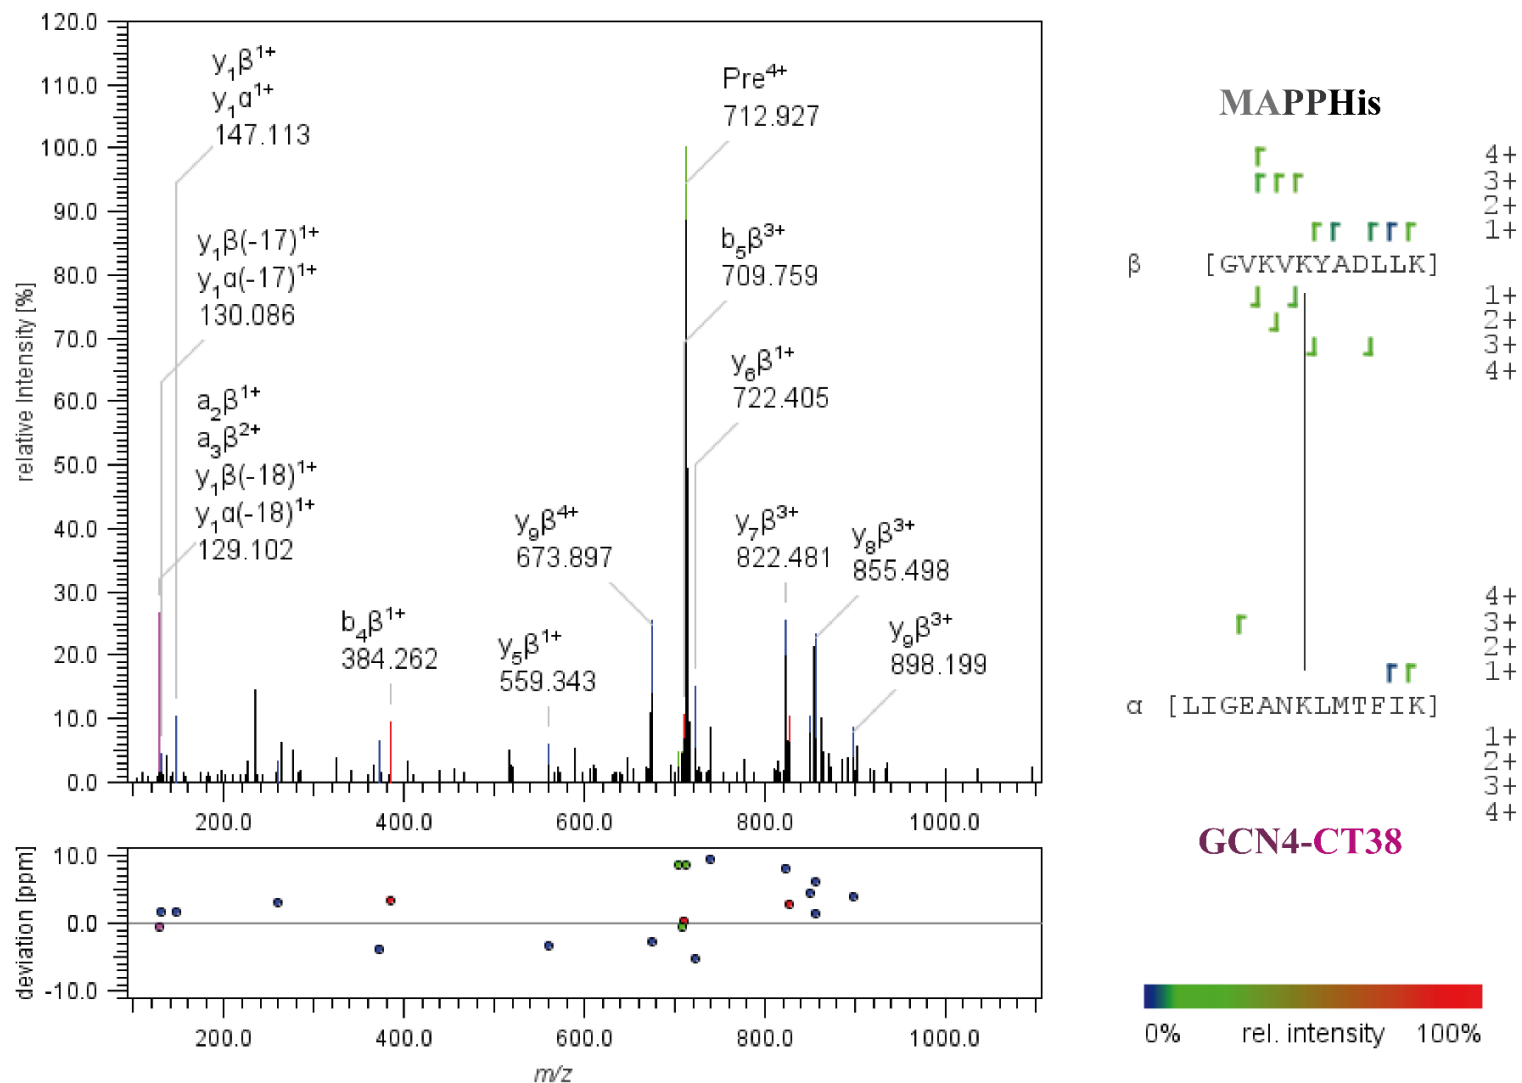

**Figure S4: The fragmentation spectrum of the K34-K27 (GCN4-CT38 to MAPPHis) cross-link.** The experimental mass of the precursor with the charge  $[M+H]^+ = 2848.674$  Da; calculated mass = 2848.662 Da; mass deviation = 4.36 ppm;  $m/z$  value = 712.924; charge = +4; calculated sequence coverage: 54%; StavroX score = 57. The cross-link sequence is on the right. The longer peptide is labelled as  $\alpha$  peptide and the shorter one as  $\beta$  peptide according to the widely used nomenclature of cross-links. All identified fragment ions are displayed in sequence by symbols for the b- or y- type of ions with their charge state and colored by their relative intensity (the range is displayed below the sequence). In the fragmentation spectra, a-type ions are in orange, b-type ions are in red, y-type ions are in blue and the precursor ion is in light green (if presented). The signals assigned as both a- and y-type ions are in purple. The only matched signals are displayed in the spectra and are characterized by type, mass and charge (the numbers in the parentheses show the neutral losses during the fragmentation if they occur). The mass-deviation plot is presented as spots below the spectrum with the range in ppm.

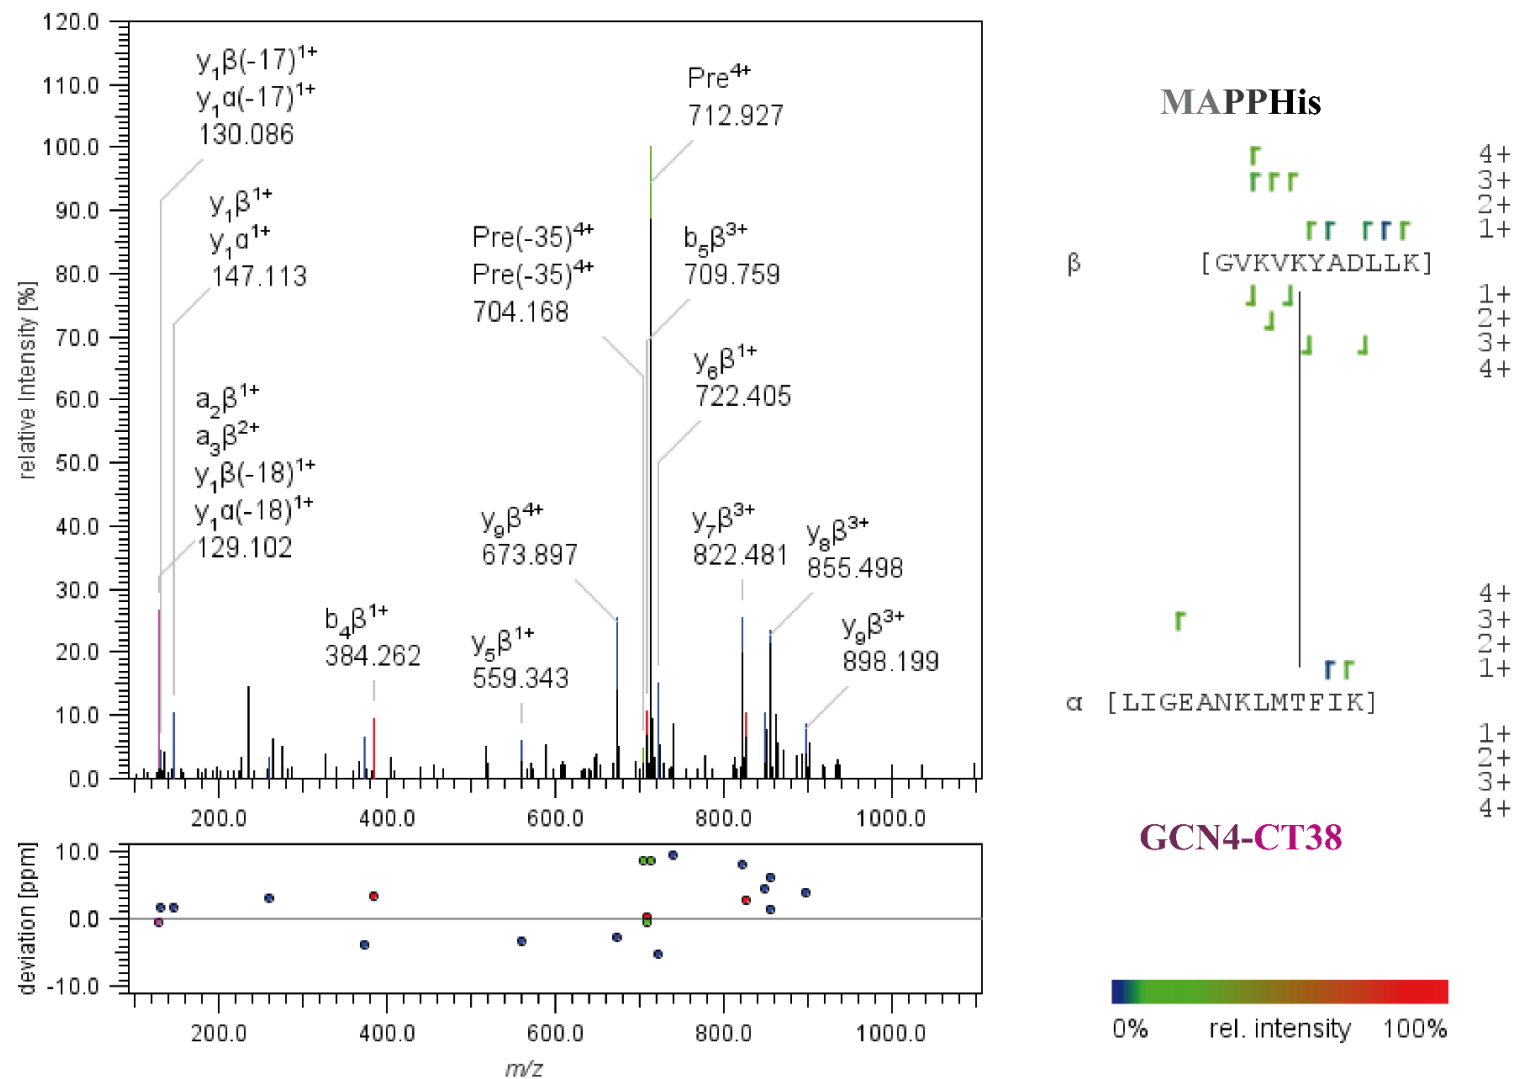

**Figure S5: The fragmentation spectrum of the T37-K27 (GCN4-CT38 to MAPPHis) cross-link.** The experimental mass of the precursor with the charge  $[M+H]^+ = 2848.674$  Da; calculated mass = 2848.662 Da; mass deviation = 4.36 ppm;  $m/z$  value = 712.924; charge = +4; calculated sequence coverage: 54%; StavroX score = 116. The sequence of cross-link is on the right. The longer peptide is labelled as  $\alpha$  peptide and the shorter one as  $\beta$  peptide according to a widely used nomenclature of cross-links. All identified fragment ions are displayed in sequence by symbols for b- or y- type of ions with their charge state and colored by their relative intensity (the range is displayed under the sequence). In fragmentation spectra a-type ions are in orange, b-type ions are in red, y-type ions are in blue and precursor ion is in light green (if presented). The signals assigned as a-type and y-type ions concurrently are in purple. The only matched signals are displayed in the spectra and are characterized by type, mass and charge (numbers in brackets show the neutral losses during fragmentation if they occur). The mass deviation plot presented as spots is situated under the spectrum with the range in ppm.



**Table S3: Identified fragment ions of K34-K27 cross-link (Figure S4) or T37-K27 cross-link (Figure S5).** The only identified fragments in spectrum of K27-K27 cross-link are presented and characterized by absolute intensity, relative intensity, experimental m/z value, calculated m/z value, mass deviation in ppm, ion type, charge state, peptide type and masses of neutral losses if they occur. The longer peptide of cross-link is labelled as  $\alpha$  peptide and the shorter one as  $\beta$  peptide according to the widely used nomenclature of cross-links. The ion type column contains a-, b- or y-type of ions according to the widely used nomenclature in peptide fragmentation pathways or abbreviation P0 for precursor ion (if presented)). The last column shows loss of ammonia (-17 Da), water (-18 Da) or higher values depends on their multiplicities (if neutral loss/losses is/are presented).

| absolute intensity | relative intensity | m/z value [Da] | calculated m/z [Da] | mass deviation [ppm] | ion type | charge state | peptide type | neutral loss [Da] |
|--------------------|--------------------|----------------|---------------------|----------------------|----------|--------------|--------------|-------------------|
| 57587.5            | 26.8               | 129.1022       | 129.1022            | -0.5394              | a2       | 1            | $\beta$      | 0                 |
| 57587.5            | 26.8               | 129.1022       | 129.1022            | -0.5394              | a3       | 2            | $\beta$      | 0                 |
| 57587.5            | 26.8               | 129.1022       | 129.1022            | -0.5394              | y1       | 1            | $\beta$      | 18                |
| 57587.5            | 26.8               | 129.1022       | 129.1022            | -0.5394              | y1       | 1            | $\alpha$     | 18                |
| 9248               | 4.3                | 130.0865       | 130.0863            | 1.7572               | y1       | 1            | $\beta$      | 17                |
| 9248               | 4.3                | 130.0865       | 130.0863            | 1.7572               | y1       | 1            | $\alpha$     | 17                |
| 22217.3            | 10.3               | 147.113        | 147.1128            | 1.6192               | y1       | 1            | $\beta$      | 0                 |
| 22217.3            | 10.3               | 147.113        | 147.1128            | 1.6192               | y1       | 1            | $\alpha$     | 0                 |
| 6803.6             | 3.2                | 260.1977       | 260.1969            | 3.0541               | y2       | 1            | $\beta$      | 0                 |
| 6803.6             | 3.2                | 260.1977       | 260.1969            | 3.0541               | y2       | 1            | $\alpha$     | 0                 |
| 13786.2            | 6.4                | 373.2795       | 373.2808            | -3.7836              | y3       | 1            | $\beta$      | 0                 |
| 20326.9            | 9.4                | 384.2618       | 384.2605            | 3.2096               | b4       | 1            | $\beta$      | 0                 |
| 12440.6            | 5.8                | 559.3432       | 559.345             | -3.2208              | y5       | 1            | $\beta$      | 0                 |
| 54783.8            | 25.5               | 673.8967       | 673.8985            | -2.7099              | y9       | 4            | $\beta$      | 0                 |
| 10411.8            | 4.8                | 704.1677       | 704.1617            | 8.5832               | P0       | 4            |              | 35                |
| 10411.8            | 4.8                | 704.1677       | 704.1617            | 8.5832               | P0       | 4            |              | 35                |
| 10138              | 4.7                | 708.6639       | 708.6643            | -0.6727              | P0       | 4            |              | 17                |
| 23203.3            | 10.8               | 709.7587       | 709.7585            | 0.4122               | b5       | 3            | $\beta$      | 0                 |
| 215128.2           | 100                | 712.927        | 712.921             | 8.4164               | P0       | 4            |              | 0                 |
| 32471.8            | 15.1               | 722.4045       | 722.4083            | -5.2737              | y6       | 1            | $\beta$      | 0                 |
| 12158.4            | 5.7                | 739.1213       | 739.1144            | 9.3328               | y7       | 3            | $\alpha$     | 36                |
| 55128.5            | 25.6               | 822.4811       | 822.4743            | 8.0884               | y7       | 3            | $\beta$      | 0                 |
| 22300.8            | 10.4               | 826.1366       | 826.1343            | 2.7503               | b8       | 3            | $\beta$      | 0                 |
| 22236.9            | 10.3               | 849.4975       | 849.4937            | 4.4211               | y8       | 3            | $\beta$      | 18                |
| 50349.1            | 23.4               | 855.4983       | 855.4972            | 1.2546               | y8       | 3            | $\beta$      | 0                 |
| 43575.1            | 20.3               | 855.8343       | 855.829             | 6.1611               | y10      | 3            | $\alpha$     | 0                 |
| 18656.7            | 8.7                | 898.1991       | 898.1956            | 3.9281               | y9       | 3            | $\beta$      | 0                 |

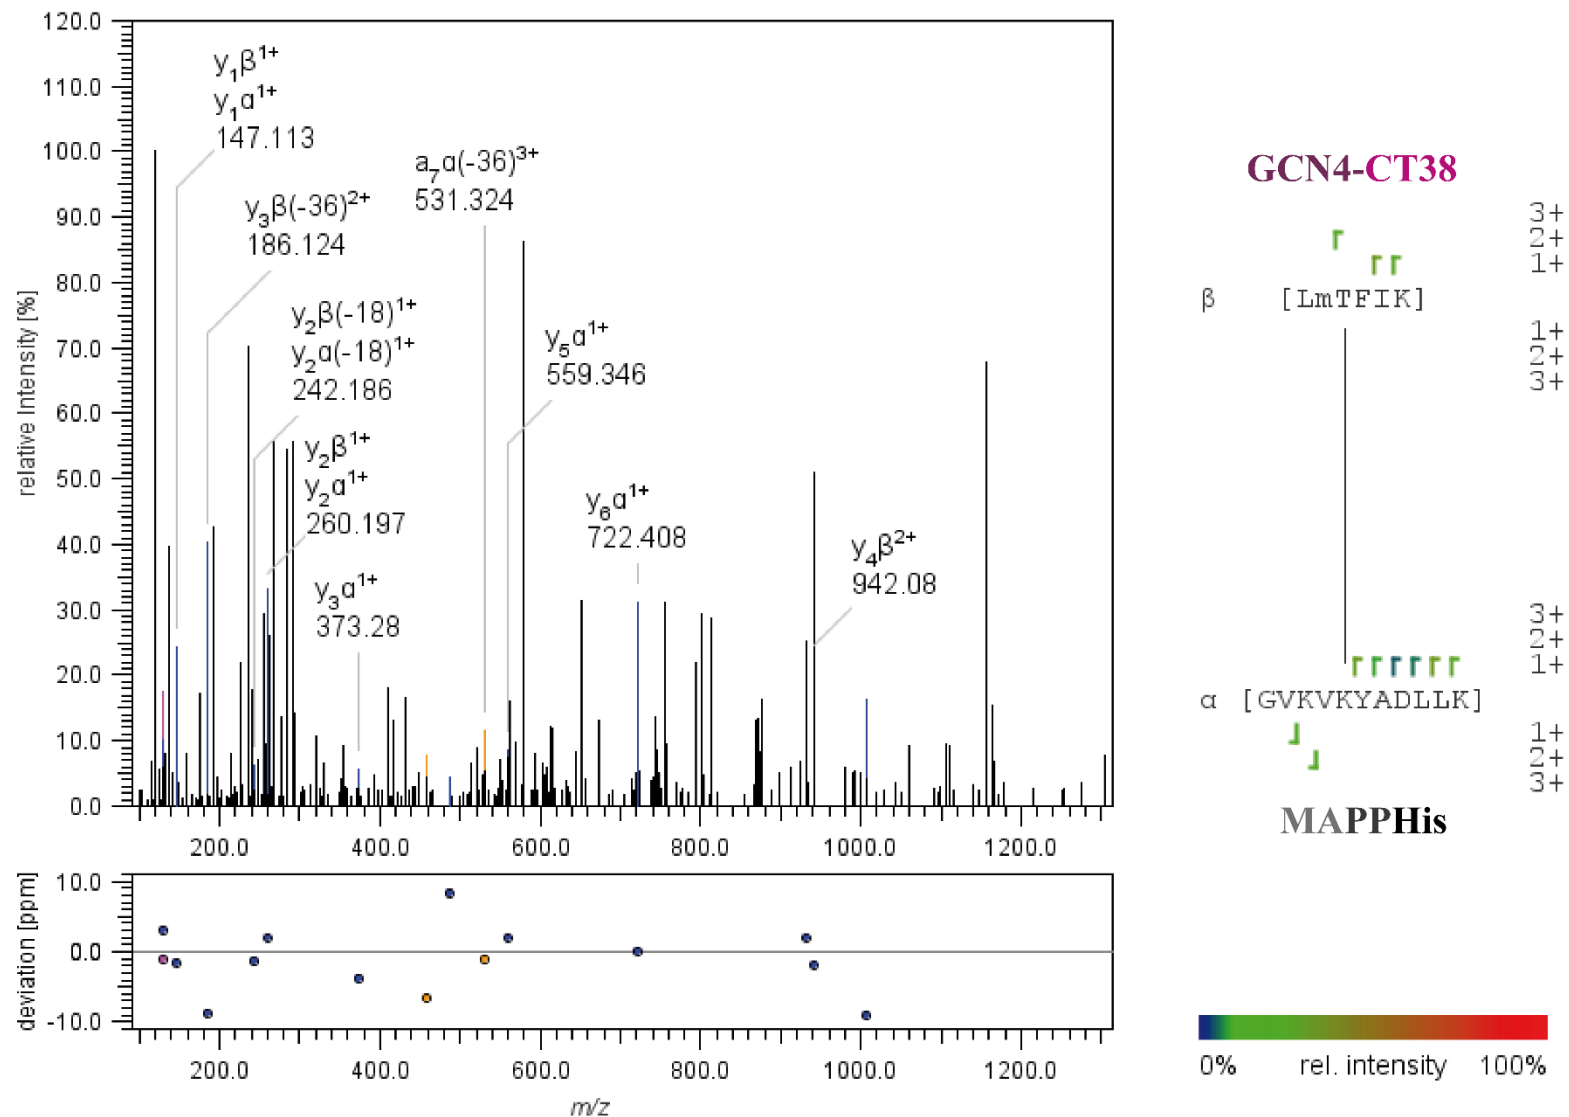

**Figure S6: Fragmentation spectrum of T37-K27 (GCN4-CT38 to MAPPHis) cross-link.** Experimental mass of precursor with charge  $[M+H]^+ = 2143.276$  Da; calculated mass = 2143.275 Da; mass deviation = 0.63 ppm; m/z value = 715.097; charge = +3; calculated sequence coverage: 65%; StavroX score = 80. The sequence of cross-link is on the right. The longer peptide is labelled as  $\alpha$  peptide and the shorter one as  $\beta$  peptide according to a widely used nomenclature of cross-links. All identified fragment ions are displayed in sequence by symbols for b- or y- type of ions with their charge state and colored by their relative intensity (the range is displayed under the sequence). In fragmentation spectra a-type ions are in orange, b-type ions are in red, y-type ions are in blue and precursor ion is in light green (if presented). The signals assigned as a-type and y-type ions concurrently are in purple. The only matched signals are displayed in the spectra and are characterized by type, mass and charge (numbers in brackets show the neutral losses during fragmentation if they occur). The mass deviation plot presented as spots is situated under the spectrum with the range in ppm.

**Table S4: Identified fragment ions of T37-K27 cross-link (Figure S6).** The only identified fragments in spectrum of K27-K27 cross-link are presented and characterized by absolute intensity, relative intensity, experimental m/z value, calculated m/z value, mass deviation in ppm, ion type, charge state, peptide type and masses of neutral losses if they occur. The longer peptide of cross-link is labelled as  $\alpha$  peptide and the shorter one as  $\beta$  peptide according to the widely used nomenclature of cross-links. The ion type column contains a-, b- or y-type of ions according to the widely used nomenclature in peptide fragmentation pathways or abbreviation P0 for precursor ion (if presented)). The last column shows loss of ammonia (-17 Da), water (-18 Da) or higher values depends on their multiplicities (if neutral loss/losses is/are presented).

| absolute intensity | relative intensity | m/z value [Da] | calculated m/z [Da] | mass deviation [ppm] | ion type | charge state | peptide type | neutral loss [Da] |
|--------------------|--------------------|----------------|---------------------|----------------------|----------|--------------|--------------|-------------------|
| 90228              | 17.4               | 129.1021       | 129.1022            | -1.2186              | a2       | 1            | $\alpha$     | 0                 |
| 90228              | 17.4               | 129.1021       | 129.1022            | -1.2186              | a3       | 2            | $\alpha$     | 0                 |
| 90228              | 17.4               | 129.1021       | 129.1022            | -1.2186              | y1       | 1            | $\beta$      | 18                |
| 90228              | 17.4               | 129.1021       | 129.1022            | -1.2186              | y1       | 1            | $\alpha$     | 18                |
| 52920.3            | 10.2               | 130.0867       | 130.0863            | 3.1225               | y1       | 1            | $\beta$      | 17                |
| 52920.3            | 10.2               | 130.0867       | 130.0863            | 3.1225               | y1       | 1            | $\alpha$     | 17                |
| 125270             | 24.2               | 147.1125       | 147.1128            | -1.5736              | y1       | 1            | $\beta$      | 0                 |
| 125270             | 24.2               | 147.1125       | 147.1128            | -1.5736              | y1       | 1            | $\alpha$     | 0                 |
| 208502             | 40.3               | 186.1241       | 186.1257            | -8.8909              | y3       | 2            | $\beta$      | 36                |
| 31472.7            | 6.1                | 242.186        | 242.1863            | -1.3583              | y2       | 1            | $\beta$      | 18                |
| 31472.7            | 6.1                | 242.186        | 242.1863            | -1.3583              | y2       | 1            | $\alpha$     | 18                |
| 172387             | 33.3               | 260.1973       | 260.1969            | 1.8404               | y2       | 1            | $\beta$      | 0                 |
| 172387             | 33.3               | 260.1973       | 260.1969            | 1.8404               | y2       | 1            | $\alpha$     | 0                 |
| 29658.8            | 5.7                | 373.2795       | 373.2808            | -3.7333              | y3       | 1            | $\alpha$     | 0                 |
| 39537.7            | 7.6                | 459.2913       | 459.2943            | -6.5686              | a5       | 3            | $\alpha$     | 18                |
| 23124.3            | 4.5                | 488.3118       | 488.3079            | 8.1373               | y4       | 1            | $\alpha$     | 0                 |
| 59919.7            | 11.6               | 531.3237       | 531.3243            | -1.0189              | a7       | 3            | $\alpha$     | 36                |
| 43944.7            | 8.5                | 559.346        | 559.345             | 1.8163               | y5       | 1            | $\alpha$     | 0                 |
| 161494             | 31.2               | 722.4084       | 722.4083            | 0.091                | y6       | 1            | $\alpha$     | 0                 |
| 56138.7            | 10.8               | 933.0779       | 933.0761            | 1.9891               | y4       | 2            | $\beta$      | 18                |
| 123810             | 23.9               | 942.0796       | 942.0813            | -1.8935              | y4       | 2            | $\beta$      | 0                 |
| 84103.7            | 16.2               | 1006.5847      | 1006.5938           | -9.0193              | y5       | 2            | $\beta$      | 18                |

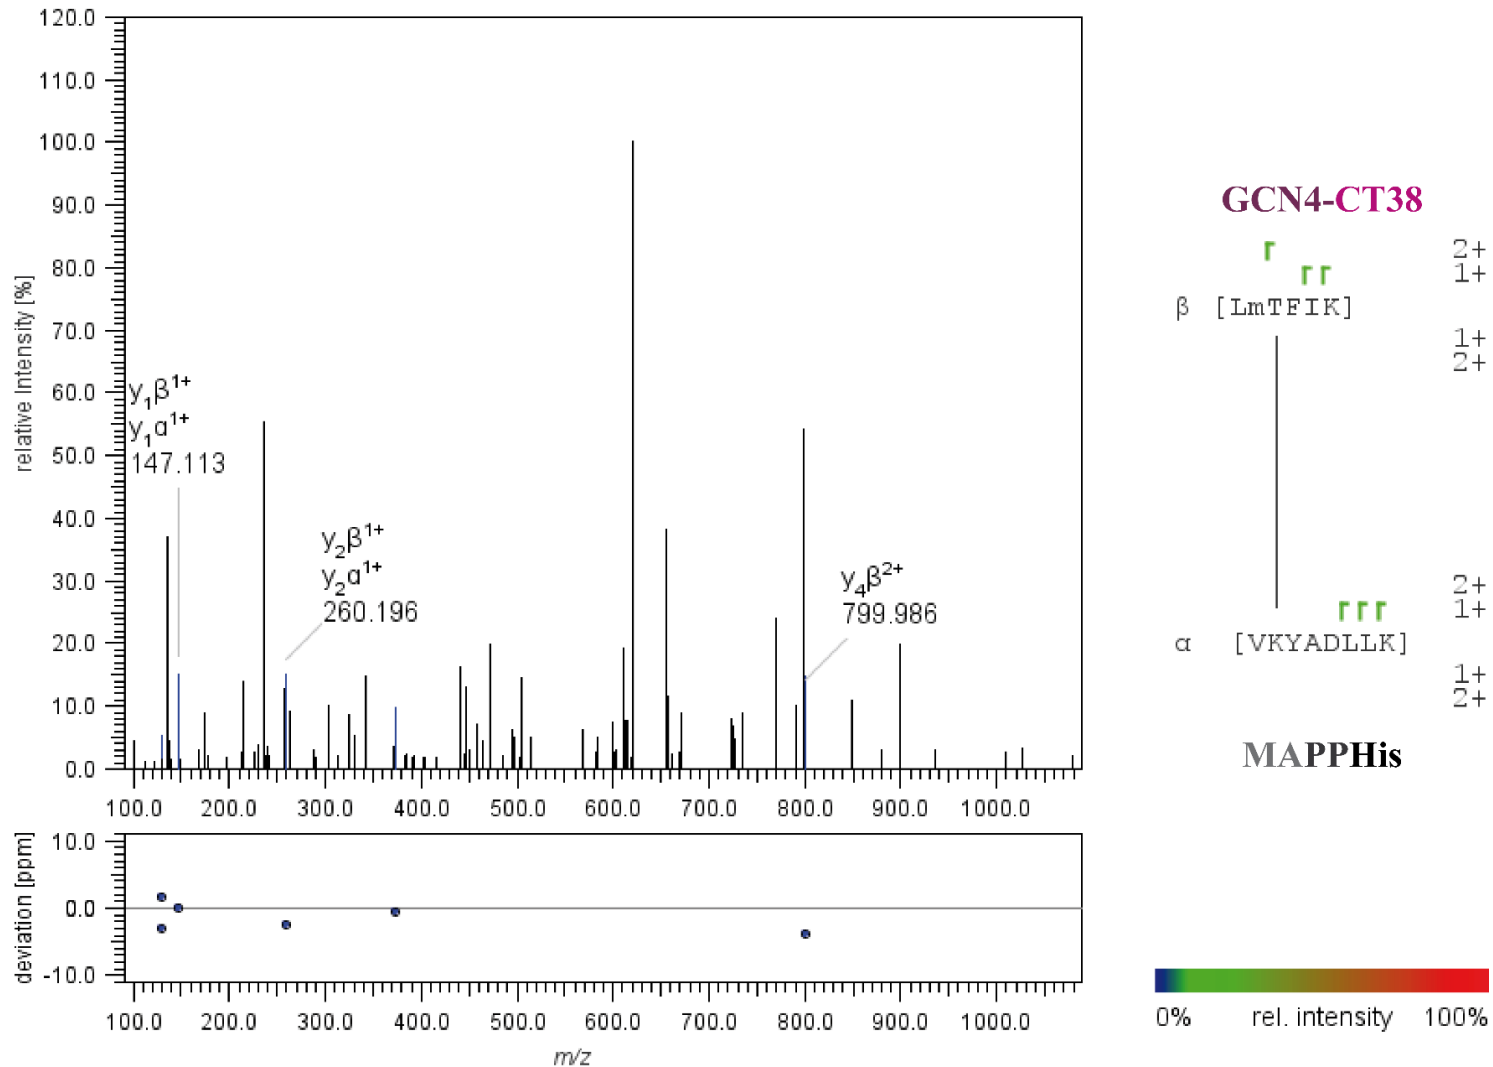

**Figure S7: The fragmentation spectrum of the T37-K27 (GCN4-CT38 to MAPPHis) cross-link.** The experimental mass of the precursor with the charge  $[M+H]^+ = 1859.087$  Da; calculated mass = 1859.090 Da; mass deviation =  $-1.43$  ppm; m/z value = 620.367; charge = +3; calculated sequence coverage: 43%; StavroX score = 43. The cross-link sequence is on the right. The longer peptide is labelled as  $\alpha$  peptide and the shorter one as  $\beta$  peptide according to the widely used nomenclature of cross-links. All identified fragment ions are displayed in sequence by symbols for the b- or y- type of ions with their charge state and colored by their relative intensity (the range is displayed below the sequence). In the fragmentation spectra, a-type ions are in orange, b-type ions are in red, y-type ions are in blue and the precursor ion is in light green (if presented). The only matched signals are displayed in the spectra and are characterized by type, mass and charge (the numbers in the parentheses show the neutral losses during the fragmentation if they occur). The mass-deviation plot is presented as spots below the spectrum with the range in ppm.

**Table S5: Identified fragment ions of T37 cross-link (Figure S7).** The only identified fragments in spectrum of K27-K27 cross-link are presented and characterized by absolute intensity, relative intensity, experimental m/z value, calculated m/z value, mass deviation in ppm, ion type, charge state, peptide type and masses of neutral losses if they occur. The longer peptide of cross-link is labelled as  $\alpha$  peptide and the shorter one as  $\beta$  peptide according to the widely used nomenclature of cross-links. The ion type column contains a-, b- or y-type of ions according to the widely used nomenclature in peptide fragmentation pathways or abbreviation P0 for precursor ion (if presented)). The last column shows loss of ammonia (-17 Da), water (-18 Da) or higher values depends on their multiplicities (if neutral loss/losses is/are presented).

| <b>absolute intensity</b> | <b>relative intensity</b> | <b>m/z value [Da]</b> | <b>calculated m/z [Da]</b> | <b>mass deviation [ppm]</b> | <b>ion type</b> | <b>charge state</b> | <b>peptide type</b> | <b>neutral loss [Da]</b> |
|---------------------------|---------------------------|-----------------------|----------------------------|-----------------------------|-----------------|---------------------|---------------------|--------------------------|
| 8184.7                    | 5.5                       | 129.1019              | 129.1022                   | -3.0127                     | y1              | 1                   | $\beta$             | 18                       |
| 8184.7                    | 5.5                       | 129.1019              | 129.1022                   | -3.0127                     | y1              | 1                   | $\alpha$            | 18                       |
| 7870.5                    | 5.3                       | 130.0865              | 130.0863                   | 1.5381                      | y1              | 1                   | $\beta$             | 17                       |
| 7870.5                    | 5.3                       | 130.0865              | 130.0863                   | 1.5381                      | y1              | 1                   | $\alpha$            | 17                       |
| 22536                     | 15.1                      | 147.1128              | 147.1128                   | -0.0162                     | y1              | 1                   | $\beta$             | 0                        |
| 22536                     | 15.1                      | 147.1128              | 147.1128                   | -0.0162                     | y1              | 1                   | $\alpha$            | 0                        |
| 22697.3                   | 15.2                      | 260.1961              | 260.1969                   | -2.554                      | y2              | 1                   | $\beta$             | 0                        |
| 22697.3                   | 15.2                      | 260.1961              | 260.1969                   | -2.554                      | y2              | 1                   | $\alpha$            | 0                        |
| 14418.1                   | 9.6                       | 373.2807              | 373.2808                   | -0.5247                     | y3              | 1                   | $\alpha$            | 0                        |
| 22060.9                   | 14.7                      | 799.9859              | 799.9888                   | -3.8038                     | y4              | 2                   | $\beta$             | 0                        |
